# Supplementary material
Source: Springer Nature journal article supplement (https://www.springerprofessional.de/resource/supplementary/13638_2011_21_MOESM4_ESM.pdf/11897282)
Supplement: MOESM4 [file 11897282]

Length: 10 bytes

---

|          |    |                           |                                |
|----------|----|---------------------------|--------------------------------|
| Kind = 8 | 10 | TS Value ( <i>TSval</i> ) | TS Echo Reply ( <i>TSecr</i> ) |
|----------|----|---------------------------|--------------------------------|

---

1

1

4

4
